# Supplementary material
Source: Springer Nature journal article supplement (https://www.springermedizin.de/resource/supplementary/12884_2013_1136_MOESM4_ESM.docx/9458996)
Supplement: MOESM4 [file 9458996]

Proportion of Women Still Alive

Figure 3: Proportion of women still alive over first year postpartum by mode of delivery
